# Supplementary material
Source: publisher figshare collection journal article supplement (https://acs.figshare.com/ndownloader/files/27405374)
Supplement: Supplementary file 1 [file 27405374]

**Title:** Impact of various microbial-fermented methods on the chemical profile of dark tea using a single raw tea material

**Authors:** Jiang Shi<sup>a1</sup>, Wanjun Ma<sup>a, b1</sup>, Chuanpi Wang<sup>c</sup>, Wenliang Wu<sup>a, d</sup>, Jun Tian<sup>e</sup>, Yue Zhang<sup>a</sup>, Yali Shi<sup>a, b</sup>, Jiatong Wang<sup>a, b</sup>, Qunhua Peng<sup>a</sup>, Zhi Lin<sup>a\*</sup>, Haipeng Lv<sup>a\*</sup>

***Affiliation:***

<sup>a</sup> Key Laboratory of Tea Biology and Resource Utilization of Ministry of Agriculture, Tea Research Institute, Chinese Academy of Agricultural Sciences, Hangzhou 310008, China

<sup>b</sup> Graduate School of Chinese Academy of Agricultural Sciences, Beijing 100081, China

<sup>c</sup> Greentown Agricultural Testing Technology Co., Ltd., Hangzhou 310052, China

<sup>d</sup> Tea Research Institute, Hunan Academy of Agricultural Sciences, Changsha 410125, China

<sup>e</sup> Kunming Colourful Yunnan King-shine Tea Industry Co., Ltd., Kunming 650501, China

**\*Corresponding Author**

Prof. Dr. Haipeng Lv; Prof. Dr. Zhi Lin

Tel./fax: +86-571-86653154

E-mail address: [linz@tricaas.com](mailto:linz@tricaas.com) (Zhi Lin); [lvhaipeng@caas.cn](mailto:lvhaipeng@caas.cn) (Haipeng Lv)

<sup>1</sup> These authors contributed equally to this work.

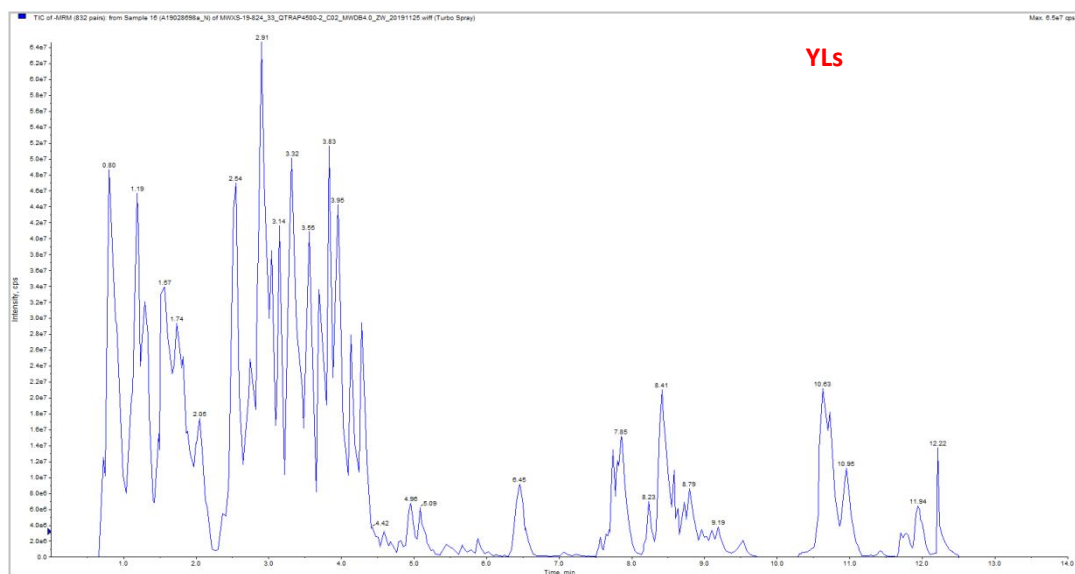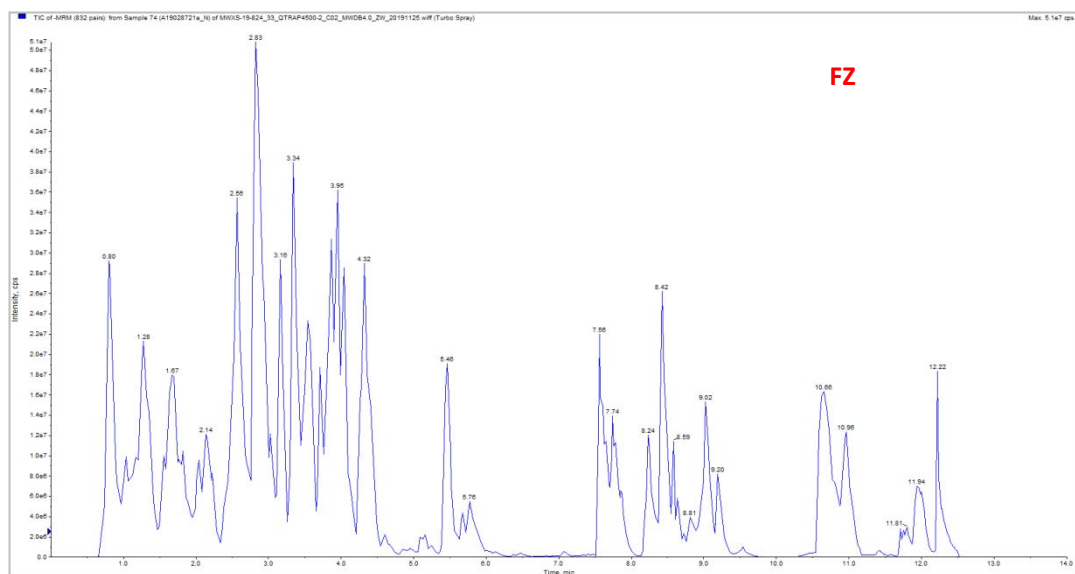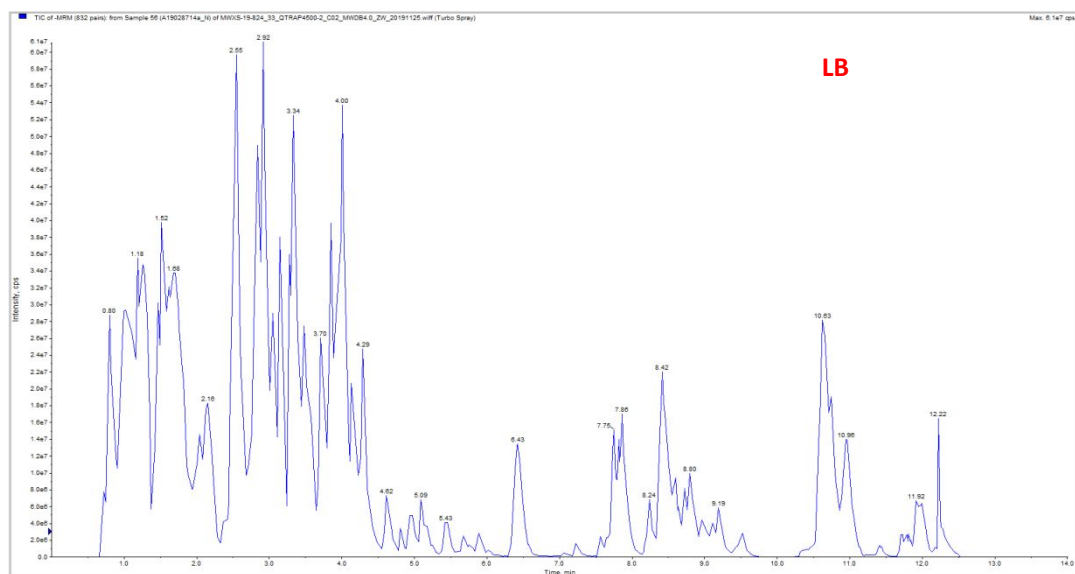

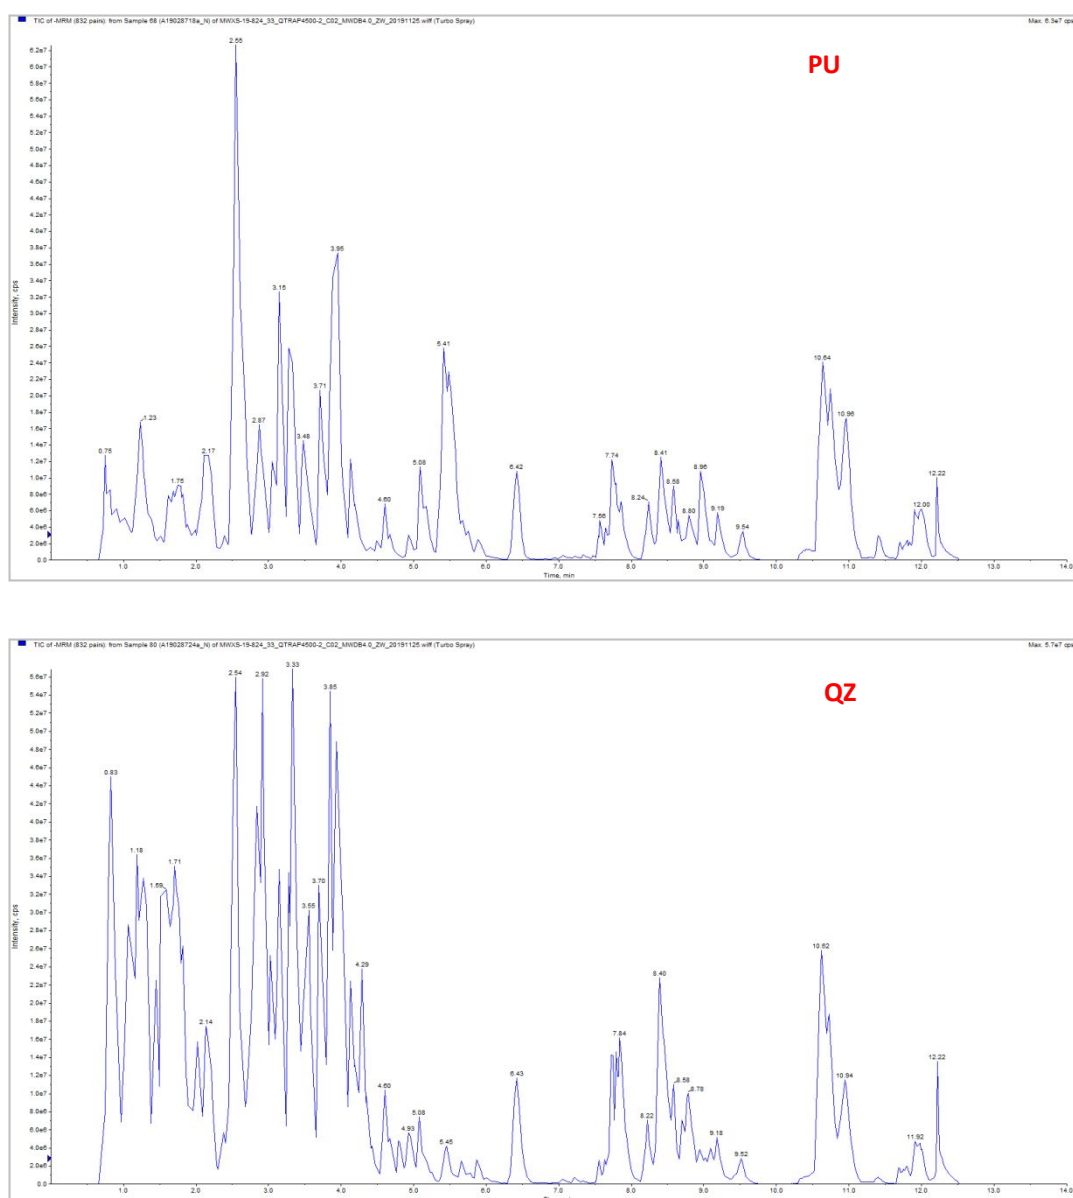

Figure S1. Typical total ion current chromatograms (TIC) of dark raw tea materials (Y<sub>L</sub>s), Fuzhuan (FZ) tea, Liu-  
pbao (LB) tea, Pu-erh (PU) tea, and Qingzhu (QZ) tea.

A

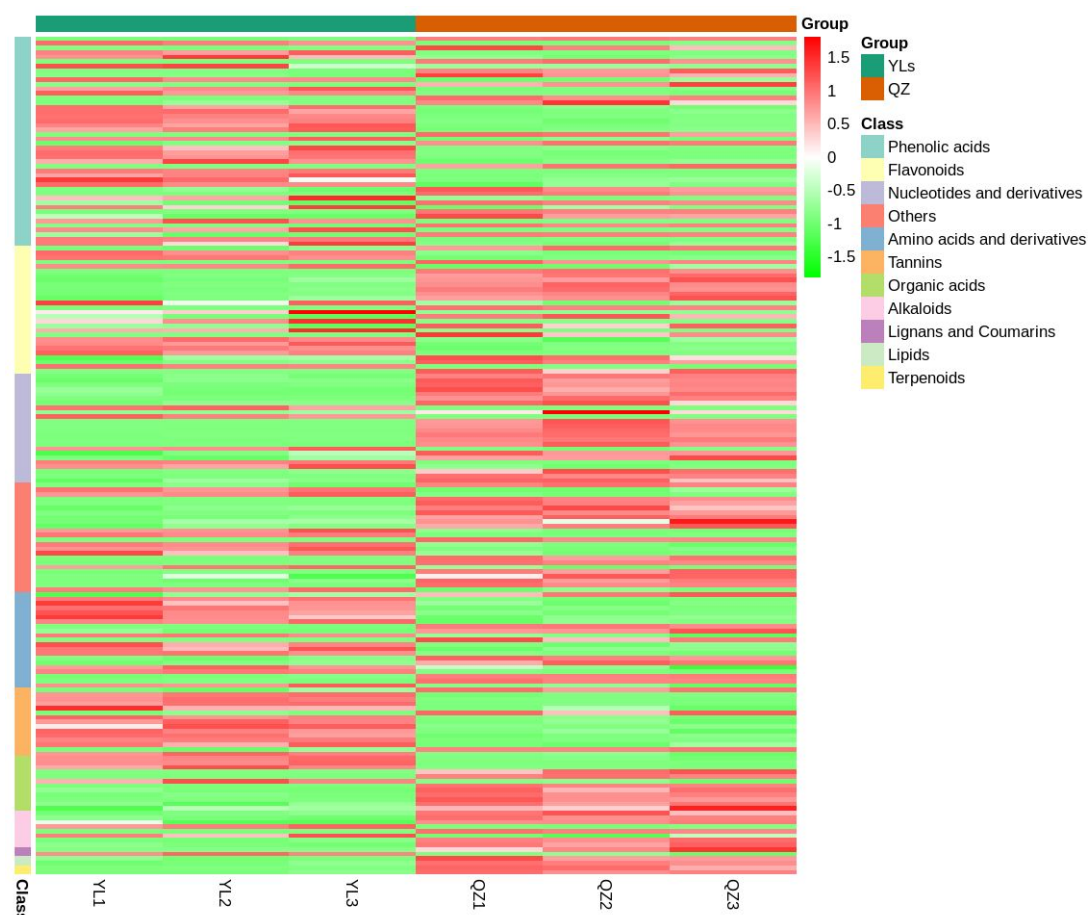

Statistics of KEGG Enrichment

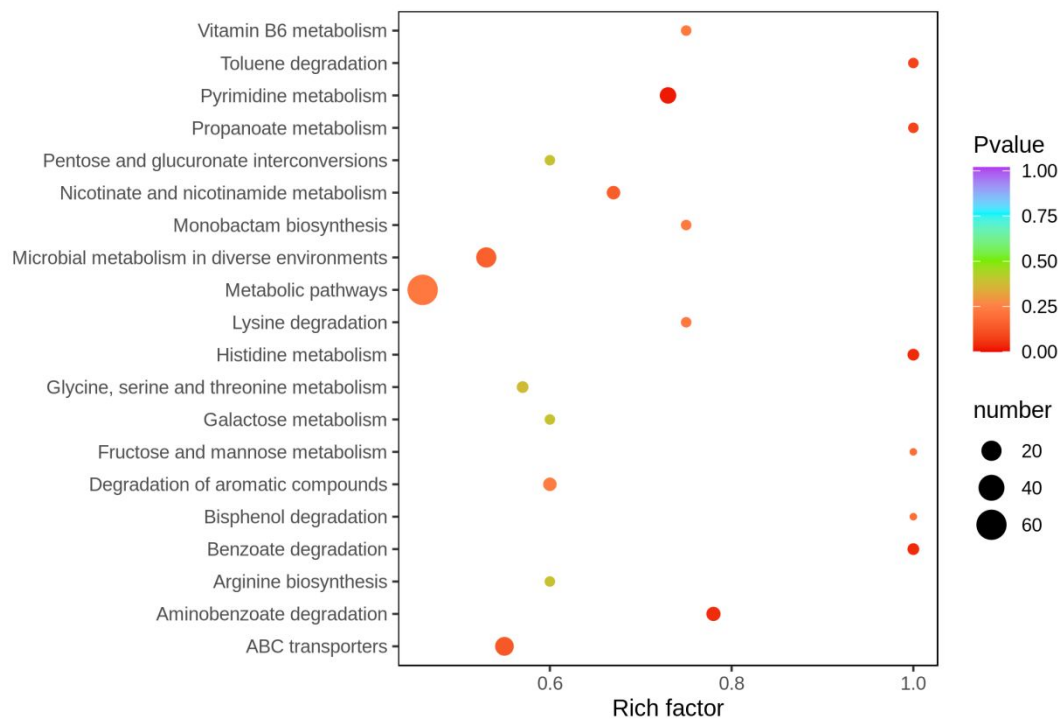

B

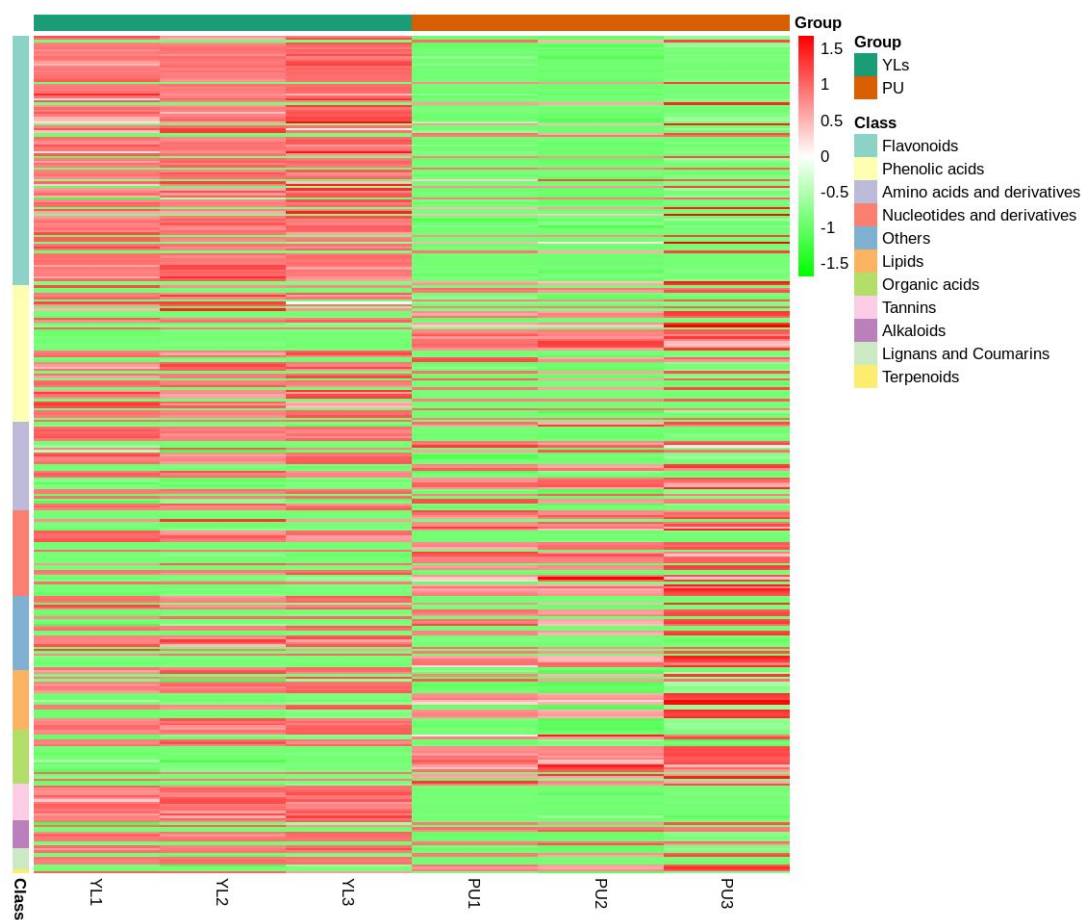

Statistics of KEGG Enrichment

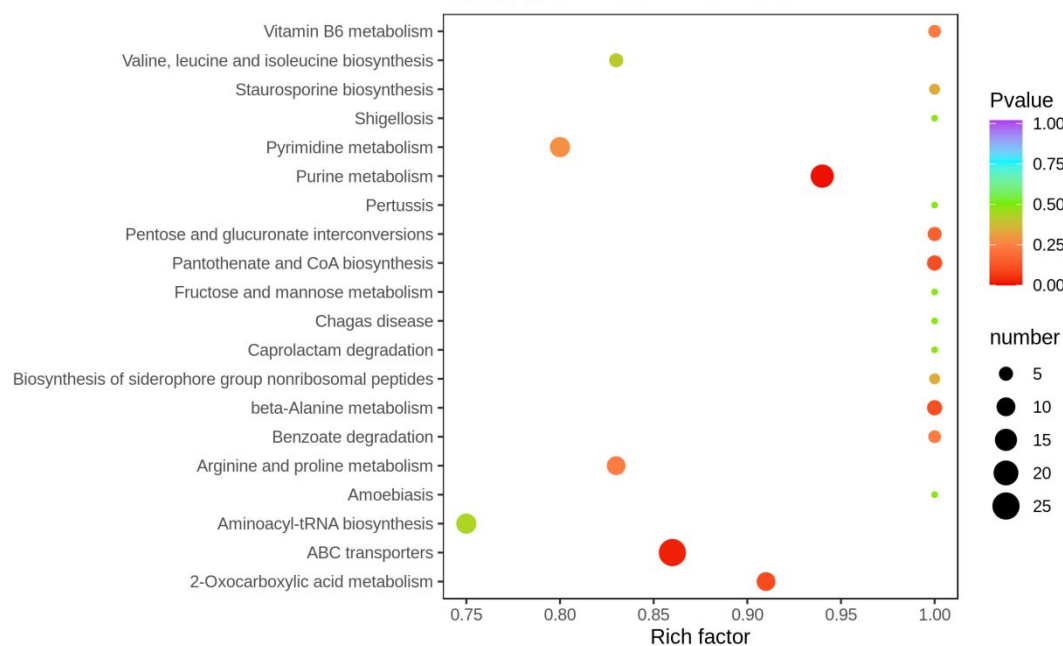

C

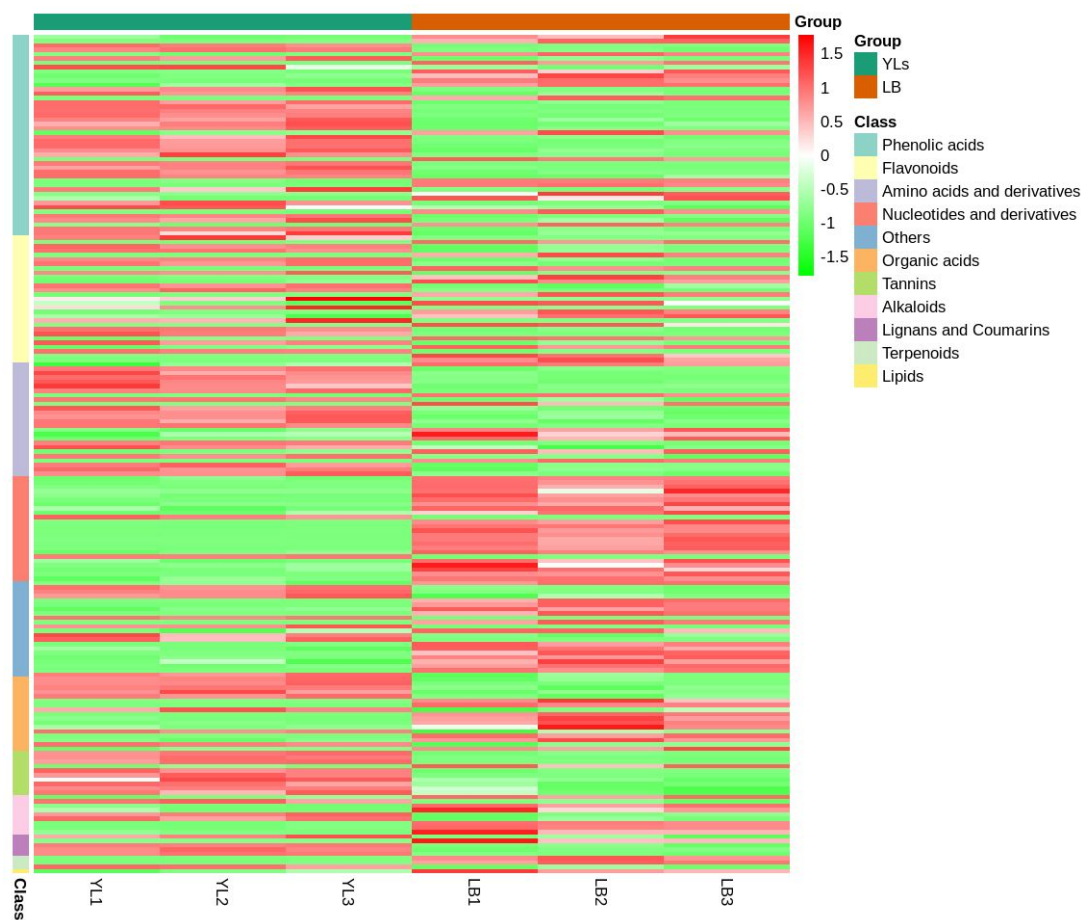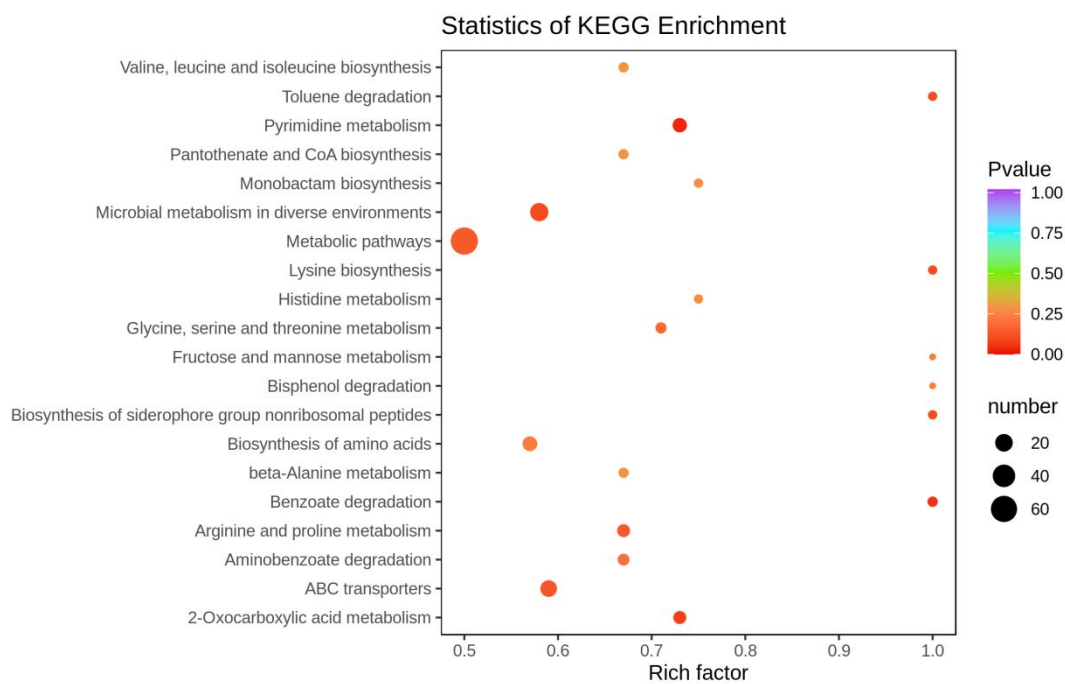

D

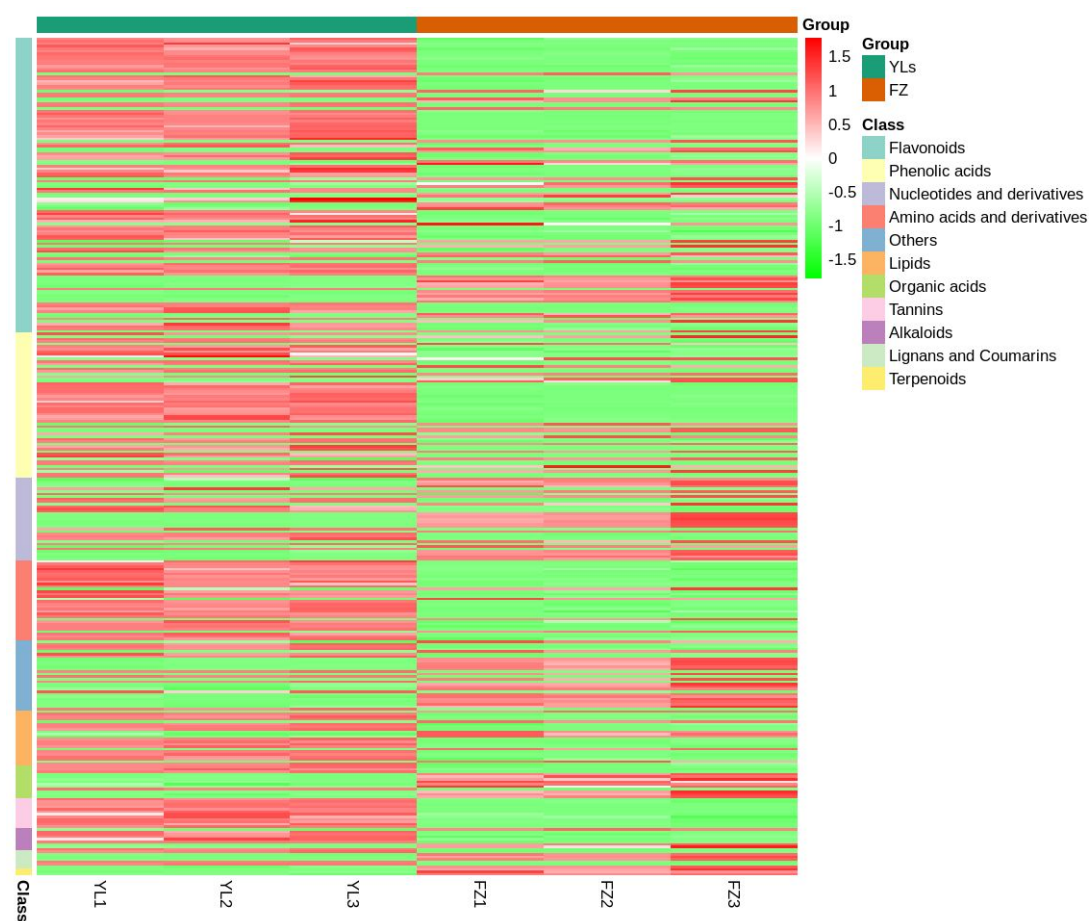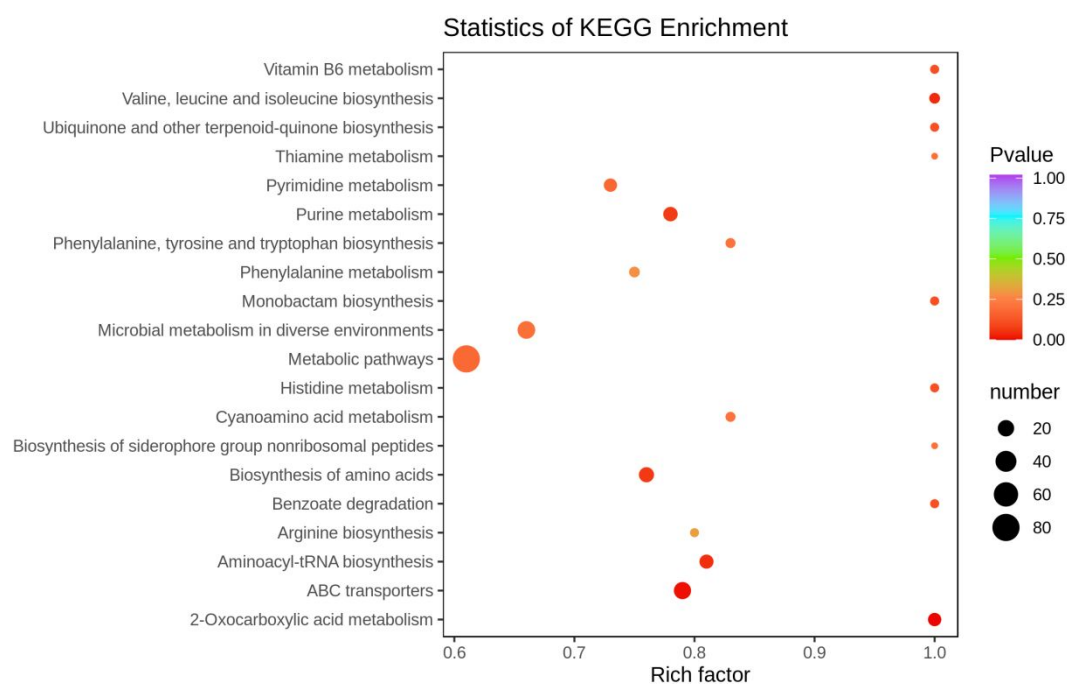

Figure S2. Heatmap of differential metabolites in CDTs compared with YLs respectively, and the KEGG-based enrichment of aforementioned metabolites. A, B, C, D, exhibited heatmap of differential metabolites in YLs\_vs\_QZ, YLs\_vs\_PU, YLs\_vs\_LB, and YLs\_vs\_FZ, and the responsive KEGG enrichment

A

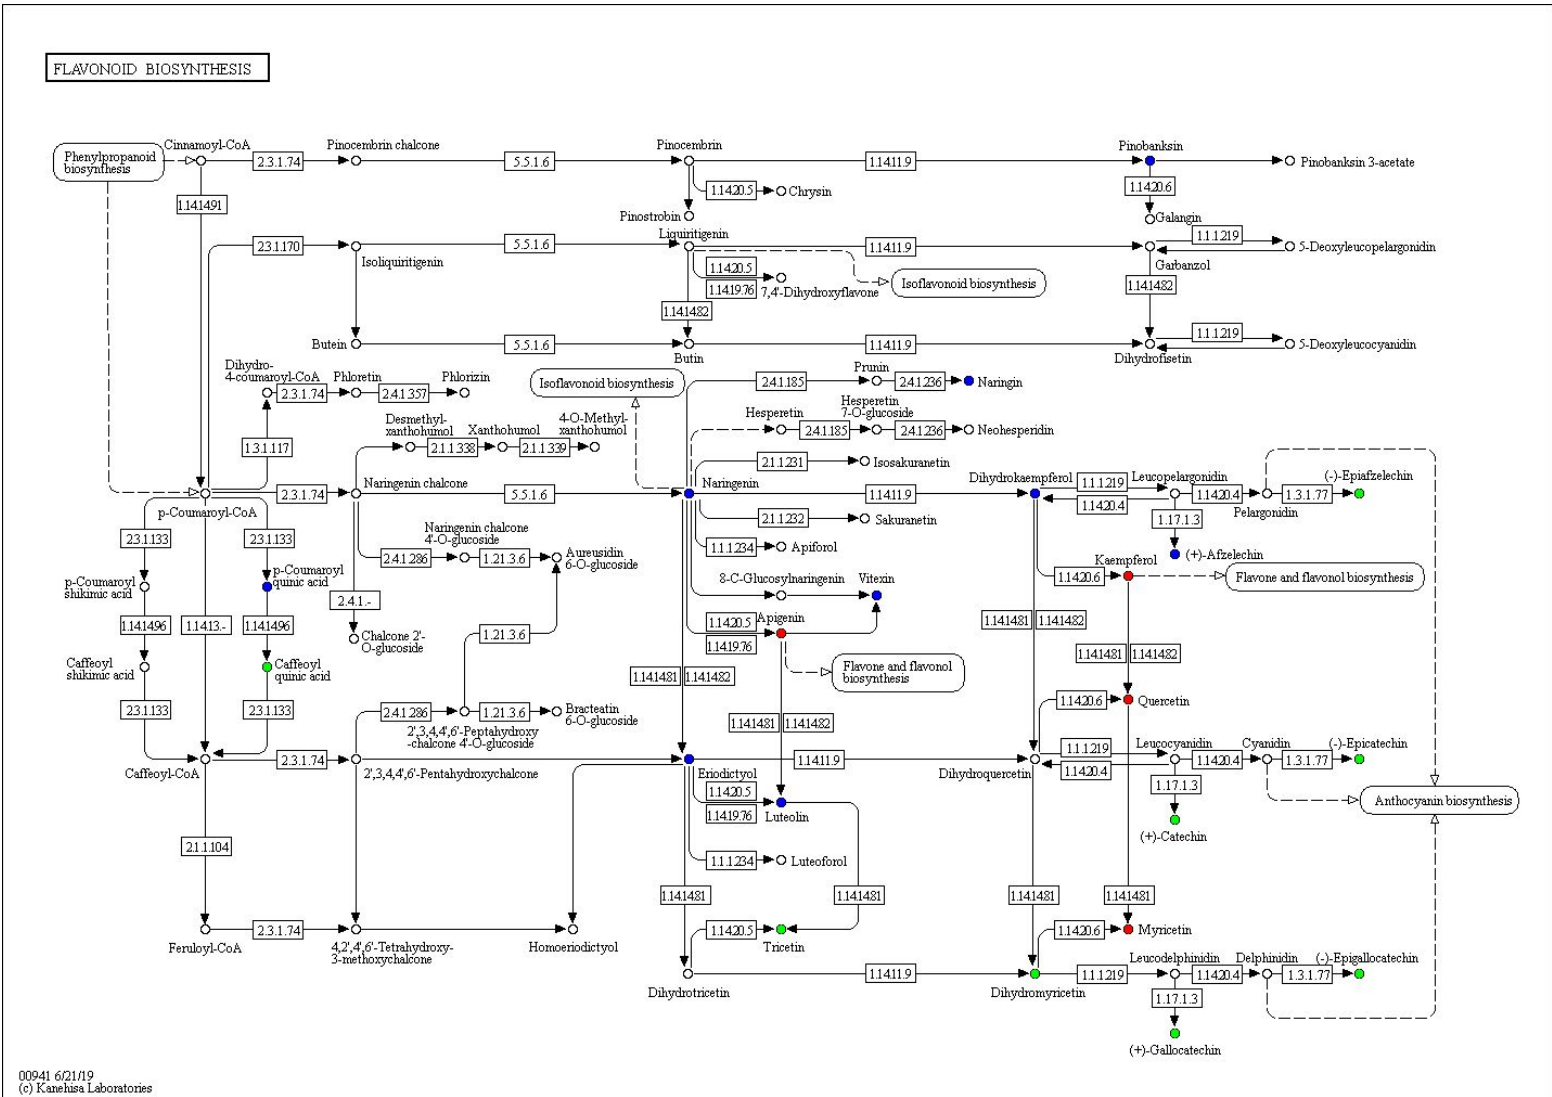



# FLAVONE AND FLAVONOL BIOSYNTHESIS

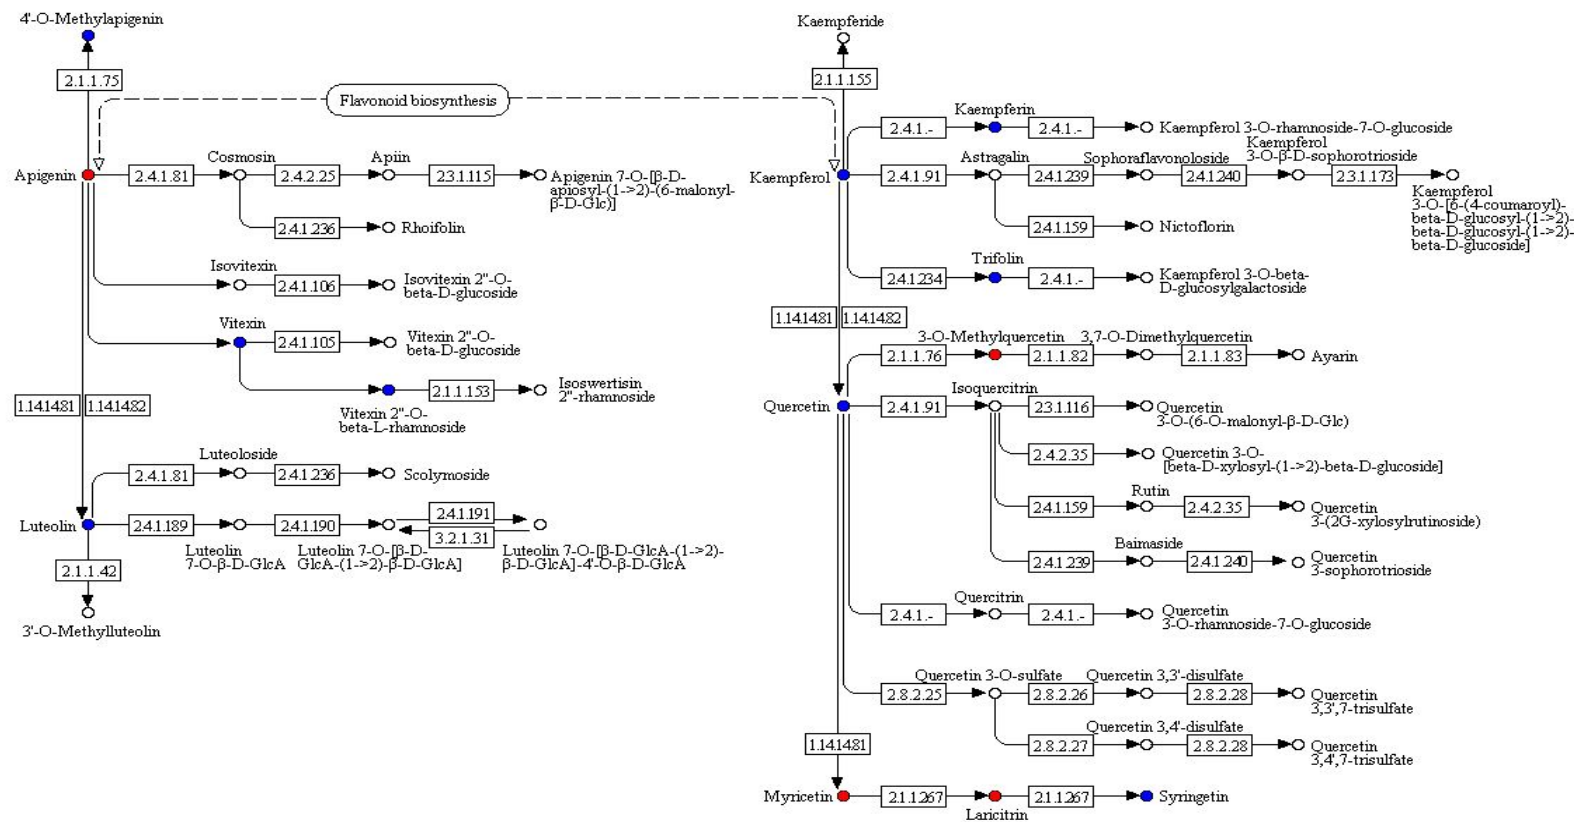

B

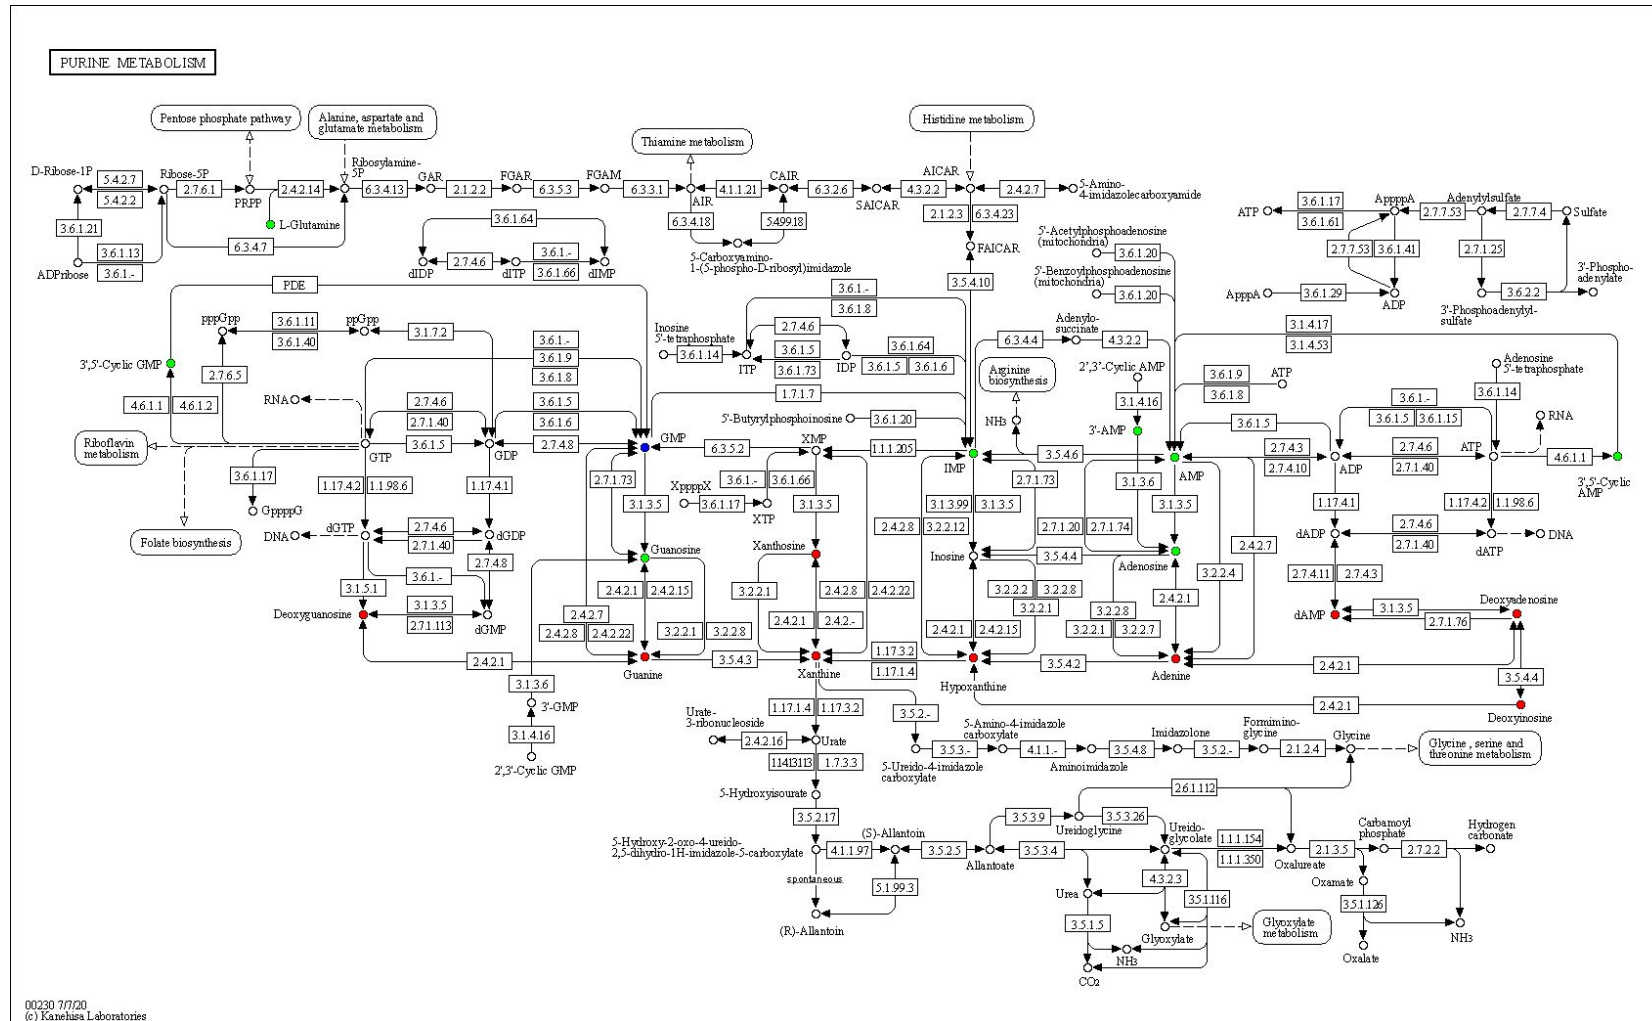

## PYRIMIDINE METABOLISM

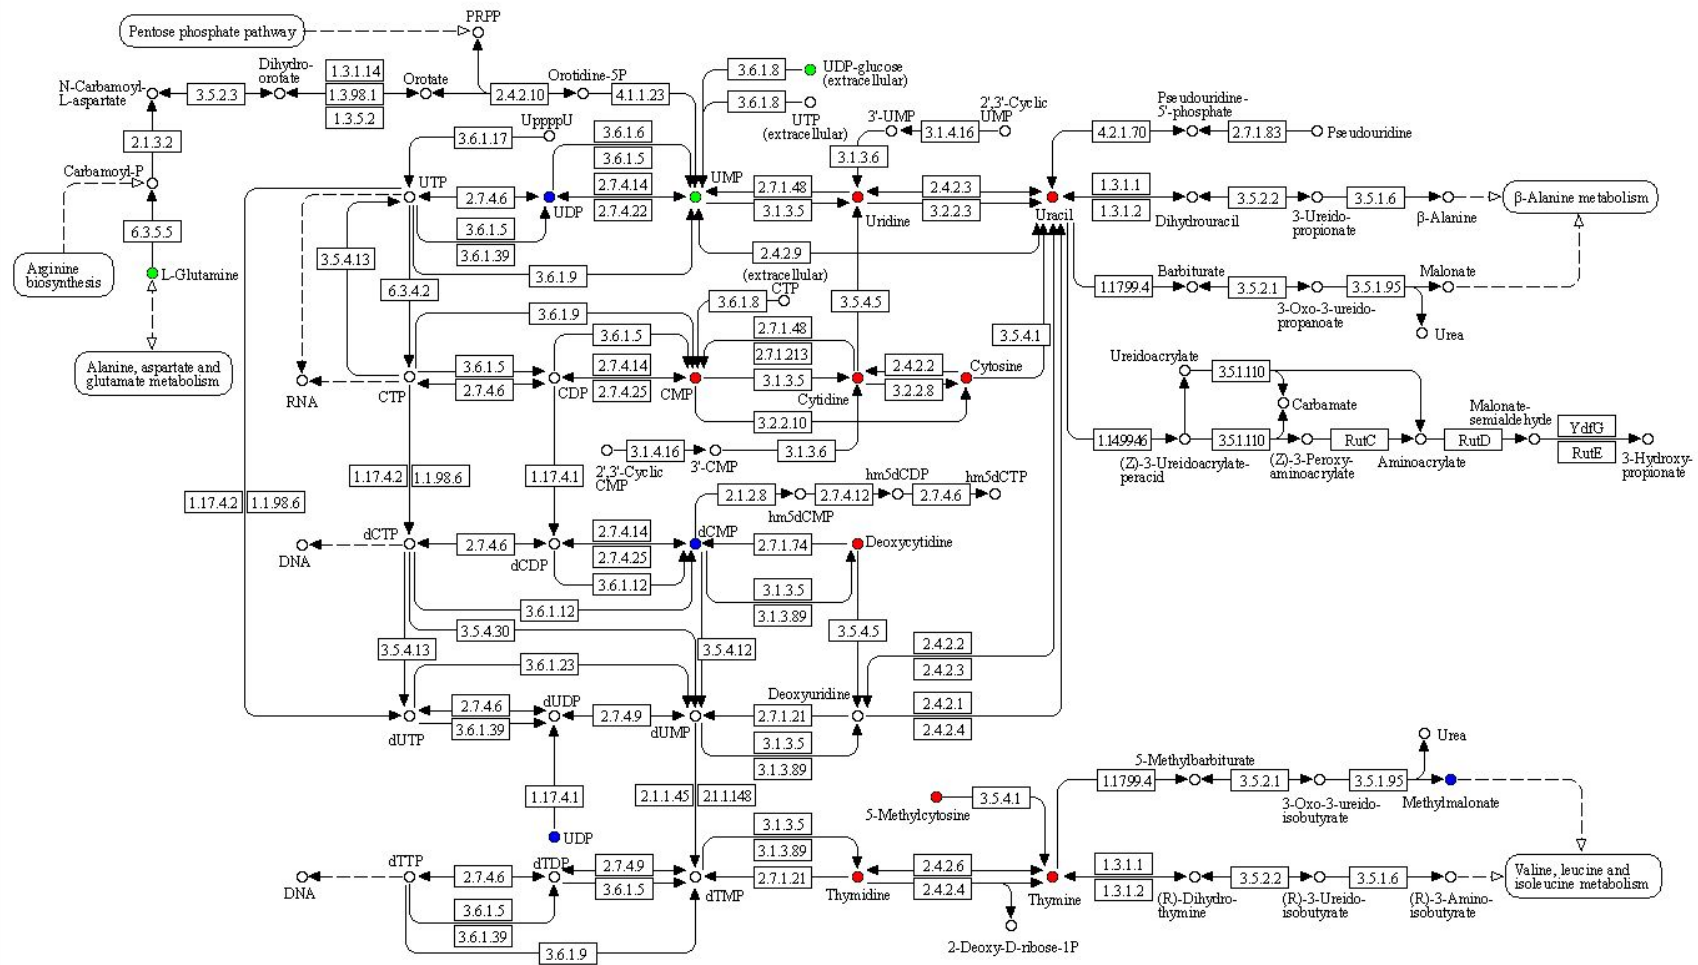

C

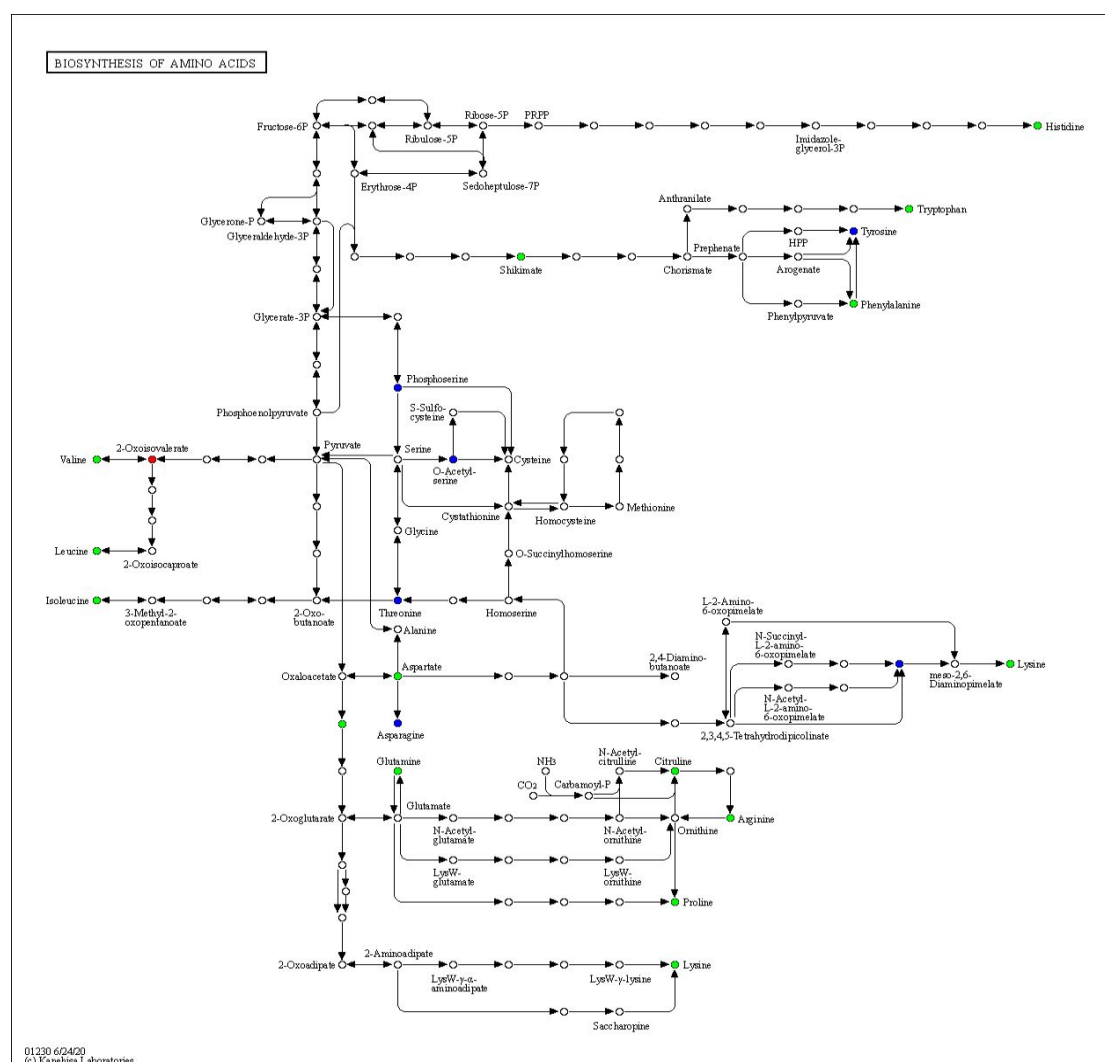

Figure S3. Visualization of differential regulated metabolites in different dark tea (CDTs) compared its raw materials (YLS). (A) Flavonoid biosynthesis pathway referring to KEGG plant and microbial library; (B) Purine and pyrimidine alkaloids metabolism pathway; and (C) Amino acid metabolism pathway.
